# Supplementary material
Source: PubMed Central journal article supplement (PMC4461057)
Supplement: NIHMS697115-supplement-supplemental_methods_and_figures.pdf [file NIHMS697115-supplement-supplemental_methods_and_figures.pdf]

## Supplementary Materials for

### **The $\alpha_v\beta_1$ integrin plays a critical in vivo role in tissue fibrosis**

Nilgun I. Reed, Hyunil Jo, Chun Chen, Kazuyuki Tsujino, Thomas D. Arnold,  
William F. DeGrado,\* Dean Sheppard\*

\*Corresponding author. E-mail: rmazitschek@mgh.harvard.edu (R.M.); dfwirth@hsph.harvard.edu (D.F.W.)

Published 20 May 2015, *Sci. Transl. Med.* **7**, 288ra79 (2015)  
DOI: 10.1126/scitranslmed.aaa5094

#### **The PDF file includes:**

- Fig. S1. Validation of cell adhesion conditions used to determine potency and specificity of  $\alpha_v\beta_1$  inhibitors.
- Fig. S2. C8 and C6 adhesion assays.
- Fig. S3. Adhesion of WI38 cells in low concentration of TGF $\beta$ 1 LAP.
- Fig. S4. Adhesion and TGF $\beta$  activation assays in A549 and 293 cells.
- Fig. S5. Original Western blot images of Fig. 2A.
- Table S1. Source data for Fig. 1 (D and E).
- Table S2. Source data for Fig. 2B.
- Table S3. Source data for Fig. 2C.
- Table S4. Source data for Fig. 2D.
- Table S5. Source data for Fig. 3C.
- Table S6. Source data for Fig. 3F.

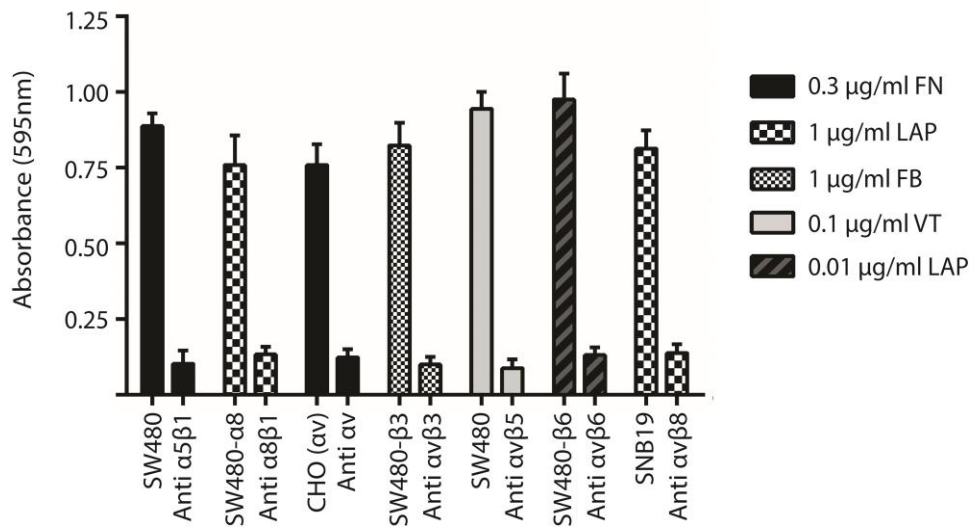

**Fig. S1.** Validation of cell adhesion conditions used to determine potency and specificity of  $\alpha_v\beta_1$  inhibitors. Cell lines and adhesion assays were optimized to isolate the effects of individual integrin. Under the conditions used for  $\alpha_5\beta_1$  (SW480 cells adhering to wells coated with 0.3  $\mu\text{g/ml}$  fibronectin (FN)),  $\alpha_8\beta_1$  (SW480 cells transfected with human  $\alpha_8$  adhering to wells coated with 1  $\mu\text{g/ml}$  TGF $\beta_1$  LAP),  $\alpha_v\beta_3$  (SW480 cells transfected with human  $\beta_3$  adhering to wells coated with 1  $\mu\text{g/ml}$  fibrinogen (FB)),  $\alpha_v\beta_5$  (SW480 cells adhering to 0.1  $\mu\text{g/ml}$  vitronectin (VT)),  $\alpha_v\beta_6$  (SW480 cells transfected with human  $\beta_6$  adhering to wells coated with 0.01  $\mu\text{g/ml}$  TGF $\beta_1$  LAP), or  $\alpha_v\beta_8$  (SNB19 cells adhering to wells coated with 1  $\mu\text{g/ml}$  TGF $\beta_1$  LAP) adhesion could be inhibited by prior incubation of cells with monoclonal antibodies blocking the relevant integrin. Since there are no specific blocking monoclonal antibodies to  $\alpha_v\beta_1$ ,  $\alpha_v\beta_1$  was evaluated by adhesion of  $\alpha_5$  integrin subunit deficient CHO cells (engineered to express the  $\alpha_v\beta_1$  integrin) adhering to 0.3  $\mu\text{g/ml}$  fibronectin. Since there are no complex specific antibodies to  $\alpha_v\beta_1$  and no antibodies that block hamster  $\beta_1$  integrins, specificity of adhesion was demonstrated by inhibition by monoclonal antibody against  $\alpha_v$ . Data represent mean  $\pm$  s.e.m., n=3.

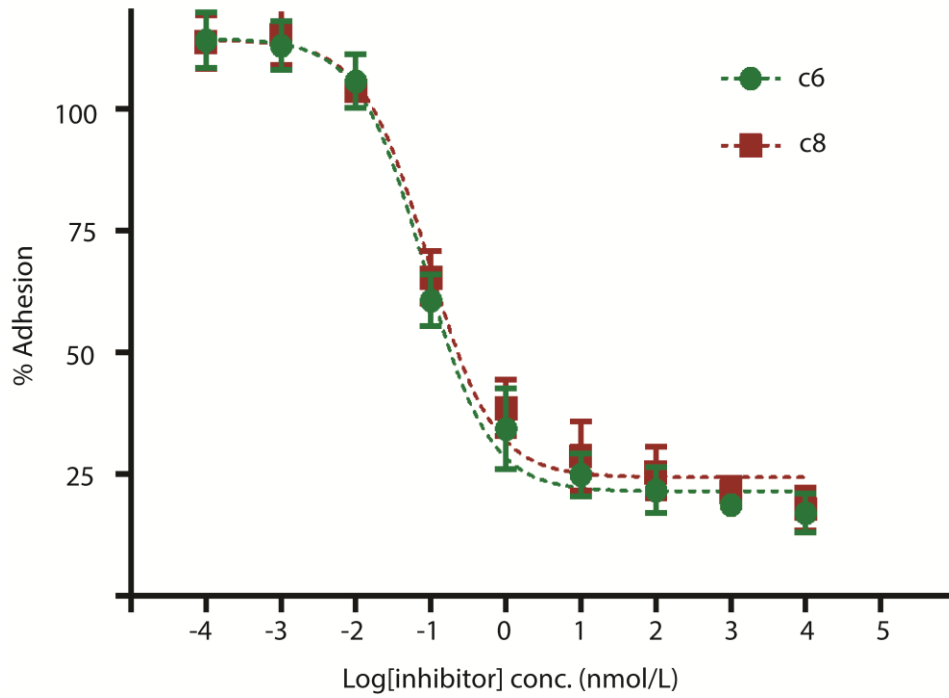

**Fig. S2.** C8 and C6 adhesion assays. Adhesion of  $\alpha 5$  integrin subunit deficient CHO cells (engineered to express the  $\alpha v \beta 1$  integrin) to  $0.3 \mu\text{g/ml}$  fibronectin was performed in the presence of a range of concentrations of c8 and c6. Data represent mean  $\pm$  s.e.m.,  $n=3$ .

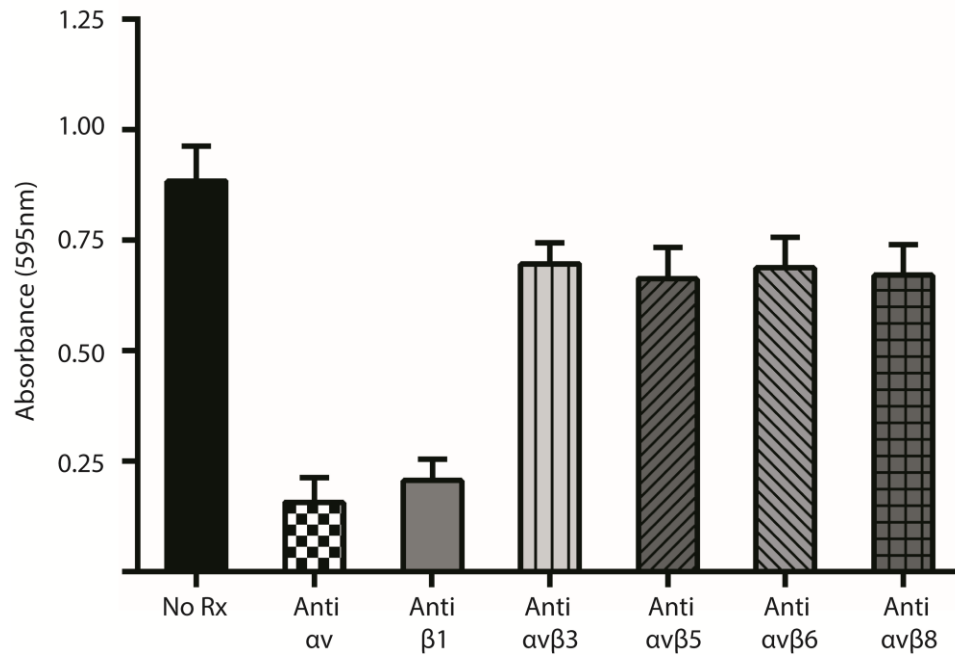

**Fig. S3.** Adhesion of WI38 cells in low concentration of TGFβ1 LAP. Adhesion of WI38 cells to wells coated with 0.3 μg/ml TGFβ1 LAP was performed after no pretreatment (No Rx) or pre-incubation with blocking monoclonal antibodies to αv or β1 or to αvβ3, αvβ5, αvβ6 or αvβ8 integrin. Data represent mean ± s.e.m., n=3.

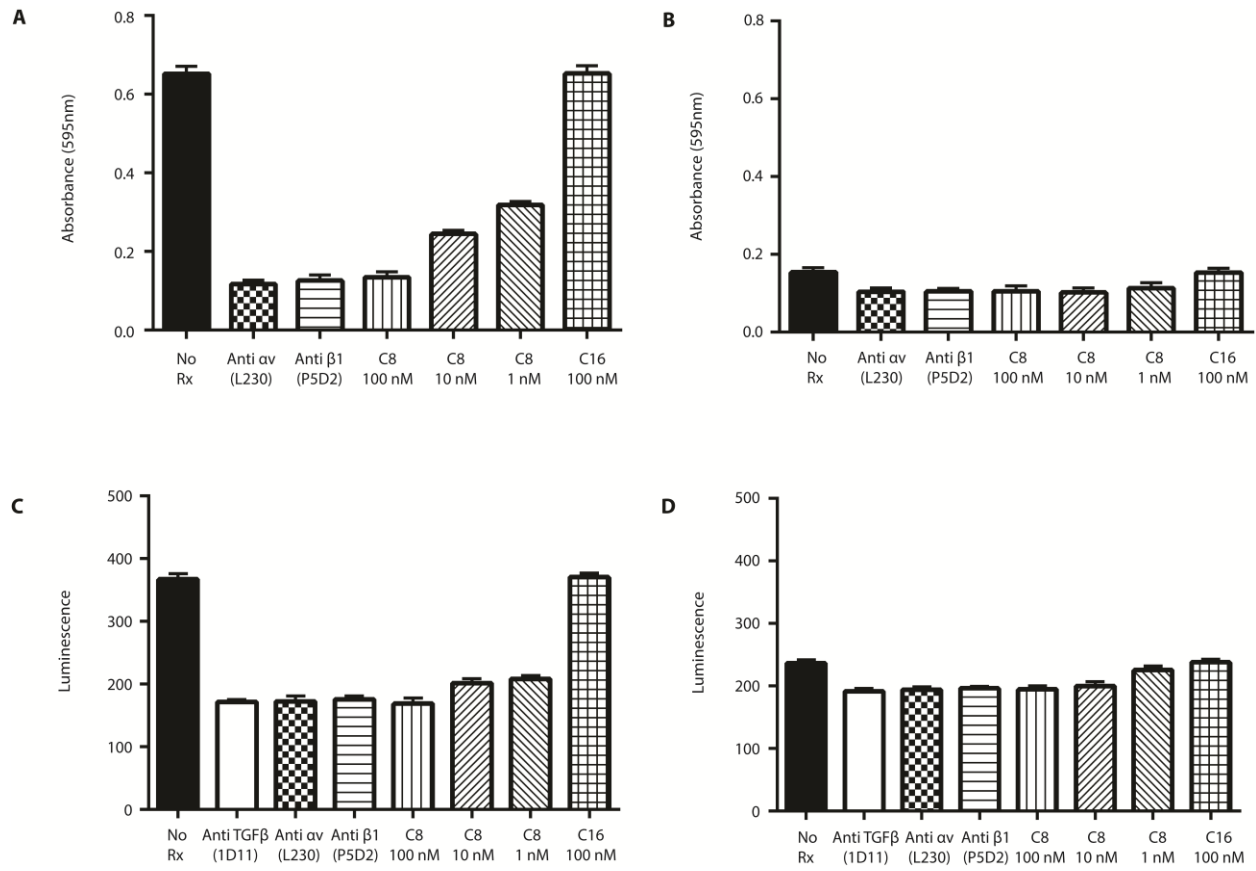

**Fig. S4.** Adhesion and TGFβ activation assays in A549 and 293 cells. Cell adhesion to 0.3 μg/ml TGFβ1LAP of A549 cells (A) or 293 cells (B) in the presence or absence of a range of concentrations of c8 or control small molecule c16 or blocking monoclonal antibodies to αv, or β1. TGFβ activity, assessed by co-culture bioassay with mink lung epithelial cells expressing luciferase under the control of a portion of the PAI1 promoter, for A549 cells (C) or 293 cells (D) in the presence or absence of a range of concentrations of c8 or c16 or blocking monoclonal antibodies to TGFβ, αv, or β1. Data represent mean ± s.e.m., n=3.

IP -  $\alpha v$   
WESTERN  $\alpha v$

mlu fb  
 $\alpha v$   
250 —  
130 —  
100 —  
70 —  
55 —

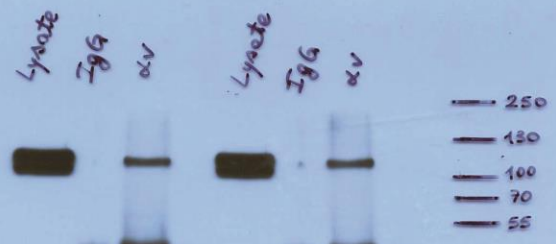

MHSC  
 $\alpha v$

CHO ( $\alpha v$ )  
 $\alpha v$   
250 —  
130 —  
100 —  
70 —  
55 —

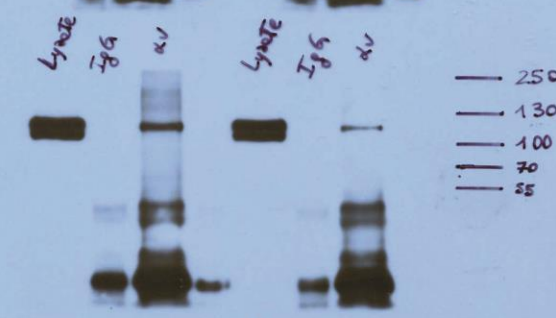

CHO (WT)  
 $\alpha v$

nhlu fb  
 $\alpha v$   
250 —  
130 —  
100 —  
70 —  
55 —

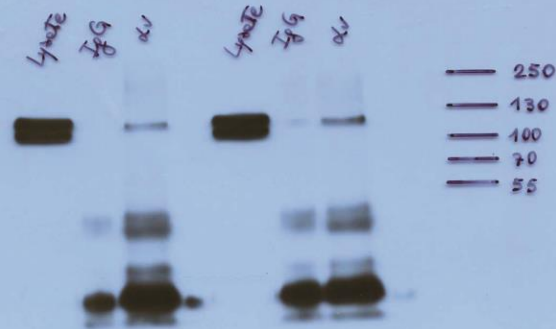

IPF fb  
 $\alpha v$

W138  
 $\alpha v$   
250 —  
130 —  
100 —  
70 —  
55 —

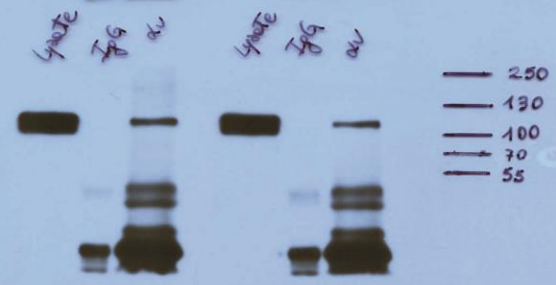

CHO ( $\alpha v$ )  
 $\alpha v$

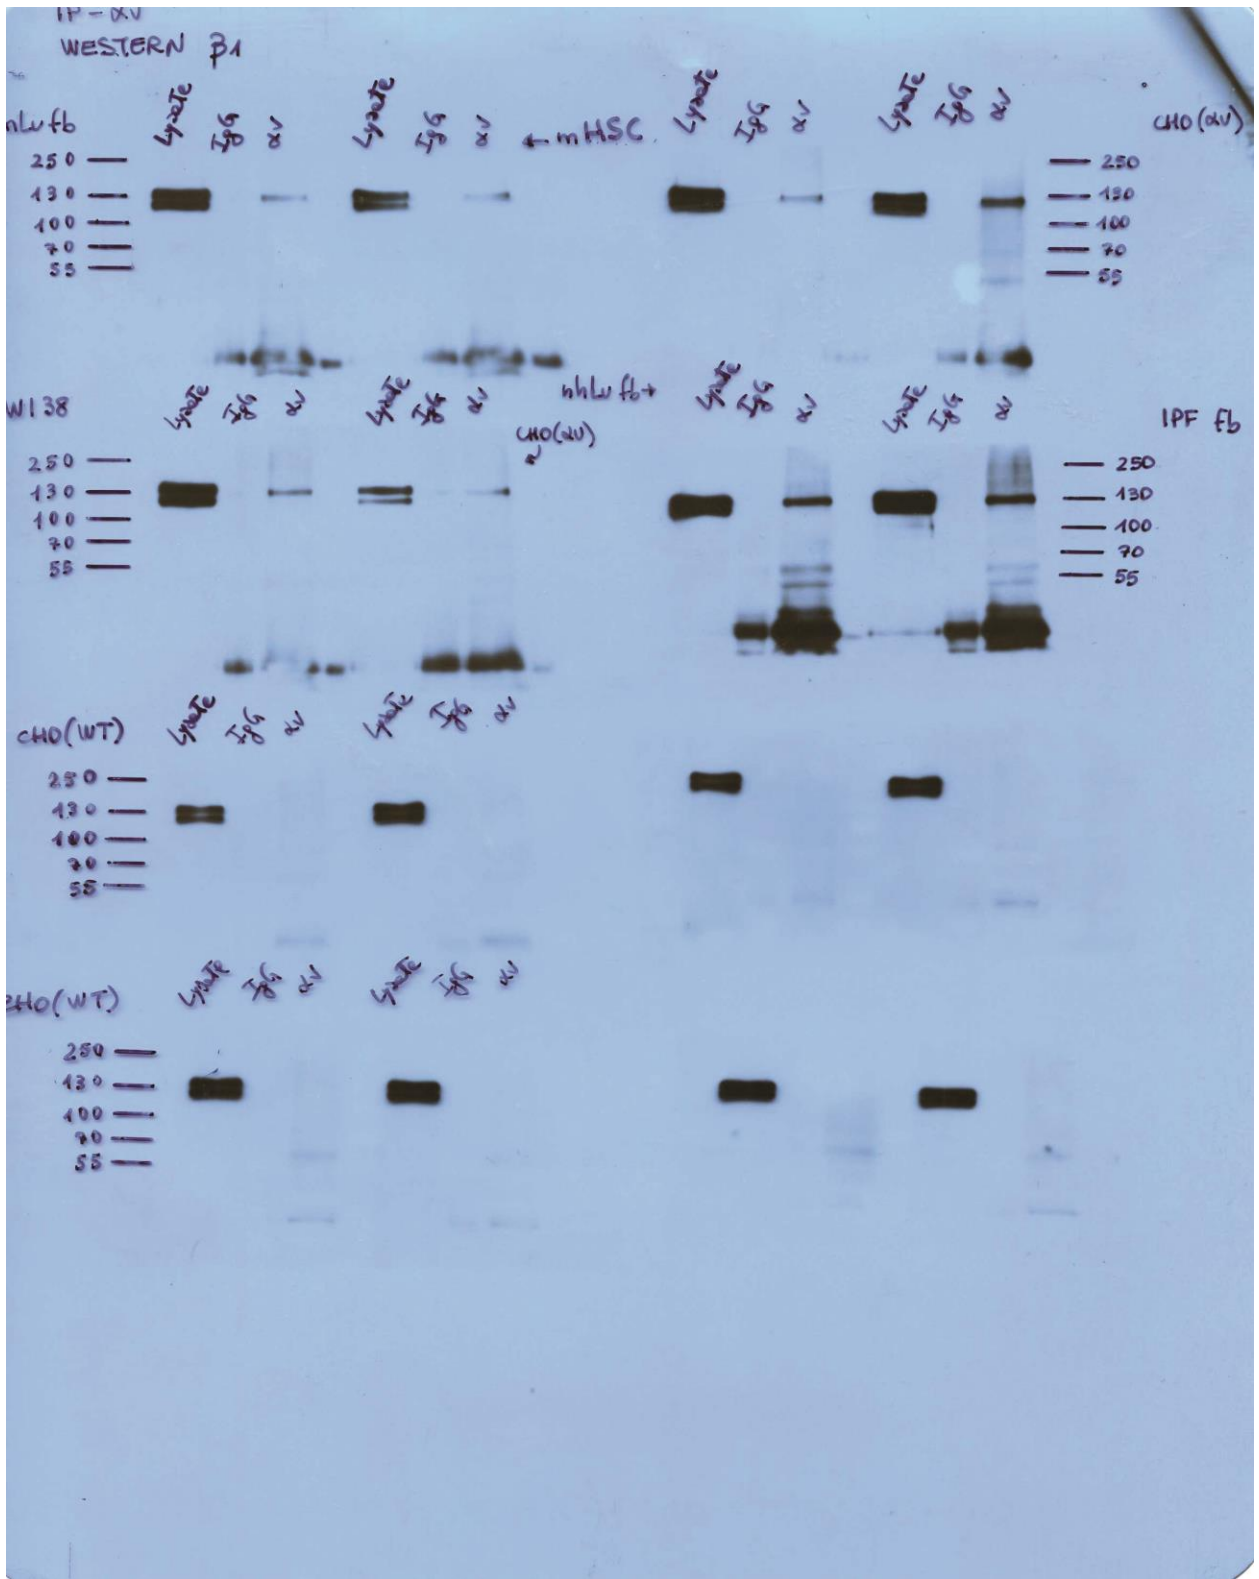

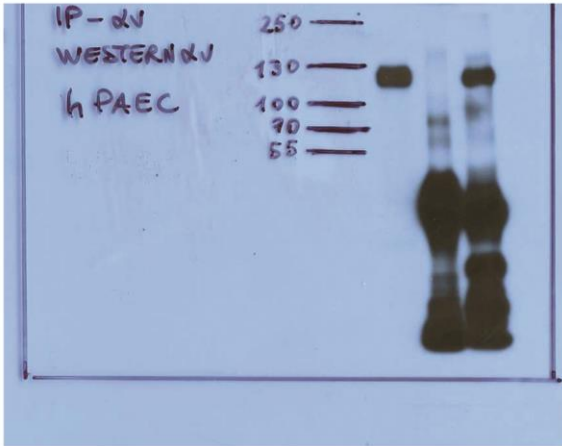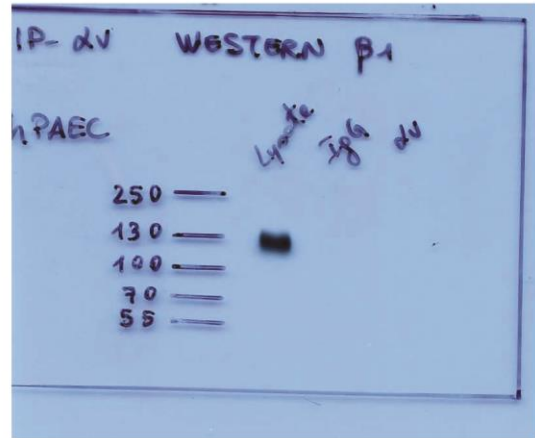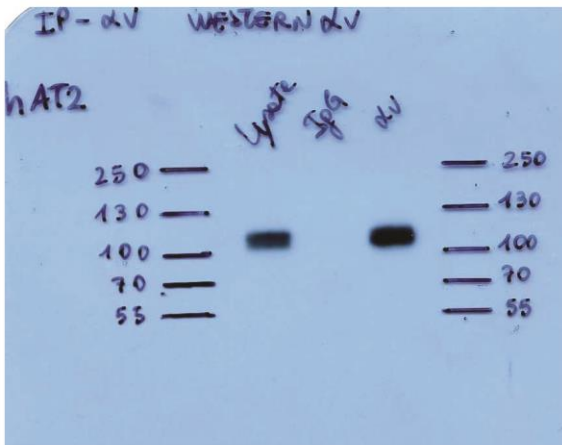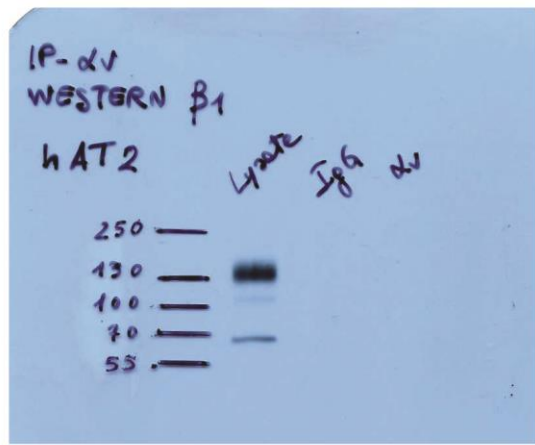

Fig. S5. Original Western blot images of Fig. 2A.



| $\alpha 5\beta 1$<br>log [c8] (nM) | Absorbance<br>(595nm) |      |      | BSA subtract |      |      | % Adhesion |     |     |
|------------------------------------|-----------------------|------|------|--------------|------|------|------------|-----|-----|
|                                    |                       |      |      |              |      |      |            |     |     |
| 4                                  | 1.28                  | 0.98 | 0.99 | 1.06         | 0.76 | 0.77 | 119        | 85  | 87  |
| 3                                  | 1.12                  | 1.18 | 0.99 | 0.90         | 0.96 | 0.77 | 102        | 108 | 86  |
| 2                                  | 1.13                  | 1.08 | 1.14 | 0.91         | 0.86 | 0.92 | 103        | 97  | 104 |
| 1                                  | 1.30                  | 1.12 | 0.98 | 1.08         | 0.89 | 0.76 | 122        | 101 | 86  |
| 0                                  | 1.11                  | 1.05 | 1.20 | 0.89         | 0.83 | 0.98 | 100        | 93  | 110 |
| -1                                 | 1.17                  | 1.12 | 1.11 | 0.94         | 0.90 | 0.89 | 106        | 101 | 100 |
| -2                                 | 1.16                  | 0.99 | 1.14 | 0.94         | 0.77 | 0.92 | 106        | 87  | 103 |
| -3                                 | 1.11                  | 1.09 | 1.10 | 0.89         | 0.87 | 0.88 | 100        | 98  | 100 |
| -4                                 | 1.20                  | 1.01 | 1.10 | 0.98         | 0.79 | 0.88 | 111        | 89  | 99  |
| No Antibody                        | 1.03                  | 1.16 | 1.14 |              |      |      |            |     |     |
| Anti $\alpha 5\beta 1$             | 0.39                  | 0.33 | 0.25 |              |      |      |            |     |     |
| BSA                                | 0.21                  | 0.19 | 0.26 |              |      |      |            |     |     |
| No Ab (avg.)-BSA(avg.)             |                       |      | 0.89 |              |      |      |            |     |     |

| $\alpha 8\beta 1$<br>log [c8] (nM) | Absorbance<br>(595nm) |      |      | BSA subtract |      |      | % Adhesion |     |     |
|------------------------------------|-----------------------|------|------|--------------|------|------|------------|-----|-----|
|                                    |                       |      |      |              |      |      |            |     |     |
| 4                                  | 1.08                  | 0.80 | 0.99 | 0.86         | 0.58 | 0.77 | 113        | 76  | 102 |
| 3                                  | 1.05                  | 1.02 | 0.88 | 0.83         | 0.80 | 0.65 | 109        | 105 | 86  |
| 2                                  | 1.08                  | 0.92 | 0.92 | 0.86         | 0.70 | 0.69 | 113        | 92  | 91  |
| 1                                  | 1.05                  | 1.07 | 0.84 | 0.83         | 0.84 | 0.62 | 110        | 111 | 82  |
| 0                                  | 1.02                  | 0.92 | 0.94 | 0.80         | 0.70 | 0.72 | 105        | 93  | 95  |
| -1                                 | 0.98                  | 1.07 | 0.91 | 0.76         | 0.85 | 0.69 | 101        | 113 | 91  |
| -2                                 | 1.01                  | 0.99 | 0.92 | 0.79         | 0.77 | 0.70 | 104        | 102 | 92  |
| -3                                 | 1.13                  | 1.11 | 0.99 | 0.91         | 0.89 | 0.77 | 120        | 117 | 102 |
| -4                                 | 1.20                  | 1.01 | 1.00 | 0.98         | 0.79 | 0.78 | 129        | 104 | 102 |
| No antibody                        | 1.17                  | 0.89 | 0.87 |              |      |      |            |     |     |
| Anti $\alpha 8\beta 1$             | 0.31                  | 0.39 | 0.36 |              |      |      |            |     |     |
| BSA                                | 0.25                  | 0.20 | 0.21 |              |      |      |            |     |     |
| No Ab (avg.)-BSA(avg.)             |                       |      | 0.76 |              |      |      |            |     |     |

| $\alpha v\beta 1$<br>log [c8] (nM) | Absorbance<br>(595nm) |      |      | BSA subtract |      |      | % Adhesion |     |     |
|------------------------------------|-----------------------|------|------|--------------|------|------|------------|-----|-----|
|                                    |                       |      |      |              |      |      |            |     |     |
| 4                                  | 0.35                  | 0.42 | 0.45 | 0.07         | 0.14 | 0.17 | 10         | 20  | 25  |
| 3                                  | 0.41                  | 0.47 | 0.41 | 0.13         | 0.19 | 0.13 | 18         | 27  | 19  |
| 2                                  | 0.39                  | 0.51 | 0.48 | 0.10         | 0.22 | 0.20 | 15         | 32  | 29  |
| 1                                  | 0.39                  | 0.56 | 0.49 | 0.11         | 0.28 | 0.21 | 16         | 41  | 30  |
| 0                                  | 0.50                  | 0.51 | 0.63 | 0.22         | 0.23 | 0.35 | 32         | 33  | 50  |
| -1                                 | 0.79                  | 0.75 | 0.66 | 0.51         | 0.47 | 0.38 | 73         | 68  | 55  |
| -2                                 | 0.99                  | 1.03 | 1.00 | 0.71         | 0.75 | 0.72 | 101        | 107 | 103 |
| -3                                 | 1.14                  | 1.12 | 1.00 | 0.85         | 0.84 | 0.72 | 123        | 120 | 103 |
| -4                                 | 1.10                  | 1.00 | 1.12 | 0.82         | 0.72 | 0.84 | 118        | 103 | 121 |
| No antibody                        | 0.92                  | 1.06 | 0.96 |              |      |      |            |     |     |
| Anti $\alpha v$                    | 0.59                  | 0.58 | 0.60 |              |      |      |            |     |     |
| BSA                                | 0.25                  | 0.32 | 0.27 |              |      |      |            |     |     |
| No Ab (avg.)-BSA(avg.)             |                       |      | 0.70 |              |      |      |            |     |     |

| $\alpha\text{v}\beta_3$<br>log [c8] (nM) | Absorbance<br>(595nm) |      |      | BSA subtract |      |      | % Adhesion |     |     |
|------------------------------------------|-----------------------|------|------|--------------|------|------|------------|-----|-----|
| 4                                        | 0.97                  | 0.89 | 0.99 | 0.76         | 0.68 | 0.78 | 94         | 83  | 96  |
| 3                                        | 0.98                  | 0.90 | 1.08 | 0.77         | 0.69 | 0.87 | 95         | 84  | 106 |
| 2                                        | 0.96                  | 0.99 | 1.05 | 0.75         | 0.78 | 0.84 | 92         | 96  | 103 |
| 1                                        | 0.96                  | 1.13 | 0.99 | 0.75         | 0.92 | 0.79 | 92         | 112 | 96  |
| 0                                        | 0.96                  | 0.98 | 1.11 | 0.76         | 0.78 | 0.90 | 93         | 95  | 110 |
| -1                                       | 0.99                  | 0.97 | 1.14 | 0.79         | 0.76 | 0.94 | 96         | 93  | 115 |
| -2                                       | 0.98                  | 1.11 | 0.99 | 0.77         | 0.90 | 0.78 | 95         | 110 | 96  |
| -3                                       | 1.12                  | 1.01 | 1.19 | 0.91         | 0.80 | 0.98 | 112        | 99  | 121 |
| -4                                       | 1.02                  | 1.19 | 1.19 | 0.82         | 0.99 | 0.98 | 100        | 121 | 120 |
| No antibody                              | 0.91                  | 1.00 | 1.16 |              |      |      |            |     |     |
| Anti $\alpha\text{v}\beta_3$             | 0.44                  | 0.42 | 0.47 |              |      |      |            |     |     |
| BSA                                      | 0.26                  | 0.16 | 0.21 |              |      |      |            |     |     |
| No Ab (avg.)-BSA(avg.)                   |                       |      | 0.82 |              |      |      |            |     |     |

| $\alpha\text{v}\beta_5$<br>log [c8] (nM) | Absorbance<br>(595nm) |      |      | BSA subtract |      |      | % Adhesion |     |     |
|------------------------------------------|-----------------------|------|------|--------------|------|------|------------|-----|-----|
| 4                                        | 1.10                  | 0.97 | 1.00 | 0.90         | 0.78 | 0.80 | 96         | 82  | 85  |
| 3                                        | 1.19                  | 1.19 | 1.12 | 0.99         | 0.99 | 0.93 | 105        | 105 | 98  |
| 2                                        | 1.18                  | 1.29 | 1.10 | 0.99         | 1.09 | 0.90 | 105        | 116 | 95  |
| 1                                        | 1.26                  | 1.14 | 1.20 | 1.06         | 0.95 | 1.00 | 112        | 100 | 106 |
| 0                                        | 1.16                  | 1.03 | 1.32 | 0.96         | 0.83 | 1.12 | 102        | 88  | 118 |
| -1                                       | 1.01                  | 1.21 | 1.15 | 0.81         | 1.02 | 0.96 | 86         | 108 | 101 |
| -2                                       | 1.18                  | 1.10 | 1.15 | 0.98         | 0.91 | 0.95 | 104        | 96  | 101 |
| -3                                       | 1.20                  | 1.30 | 1.02 | 1.00         | 1.10 | 0.82 | 106        | 117 | 87  |
| -4                                       | 1.13                  | 1.19 | 1.13 | 0.93         | 1.00 | 0.93 | 98         | 105 | 99  |
| No antibody                              | 1.21                  | 1.03 | 1.18 |              |      |      |            |     |     |
| Anti $\alpha\text{v}\beta_5$             | 0.28                  | 0.34 | 0.24 |              |      |      |            |     |     |
| BSA                                      | 0.20                  | 0.20 | 0.19 |              |      |      |            |     |     |
| No Ab (avg.)-BSA(avg.)                   |                       |      | 0.95 |              |      |      |            |     |     |

| $\alpha\text{v}\beta_6$<br>log [c8] (nM) | Absorbance<br>(595nm) |      |      | BSA subtract |      |      | % Adhesion |     |     |
|------------------------------------------|-----------------------|------|------|--------------|------|------|------------|-----|-----|
| 4                                        | 1.26                  | 1.41 | 1.20 | 1.05         | 1.21 | 1.00 | 108        | 124 | 103 |
| 3                                        | 1.23                  | 1.42 | 1.10 | 1.02         | 1.22 | 0.90 | 105        | 125 | 92  |
| 2                                        | 1.26                  | 1.42 | 1.17 | 1.05         | 1.22 | 0.97 | 108        | 125 | 100 |
| 1                                        | 1.18                  | 1.36 | 1.22 | 0.98         | 1.15 | 1.02 | 100        | 119 | 105 |
| 0                                        | 1.29                  | 1.36 | 1.03 | 1.08         | 1.16 | 0.83 | 111        | 119 | 85  |
| -1                                       | 1.36                  | 1.02 | 1.31 | 1.15         | 0.82 | 1.11 | 119        | 84  | 114 |
| -2                                       | 1.02                  | 1.37 | 1.27 | 0.81         | 1.16 | 1.06 | 83         | 120 | 109 |
| -3                                       | 1.11                  | 1.20 | 1.10 | 0.91         | 1.00 | 0.90 | 93         | 103 | 92  |
| -4                                       | 1.17                  | 1.20 | 1.20 | 0.97         | 1.00 | 0.99 | 100        | 103 | 102 |
| No antibody                              | 1.21                  | 1.31 | 1.02 |              |      |      |            |     |     |
| Anti $\alpha\text{v}\beta_6$             | 0.80                  | 0.74 | 0.85 |              |      |      |            |     |     |

|                        |      |      |      |
|------------------------|------|------|------|
| BSA                    | 0.22 | 0.19 | 0.20 |
| No Ab (avg.)-BSA(avg.) |      |      | 0.97 |

| $\alpha\beta 8$<br>log [c8] (nM) | Absorbance<br>(595nm) |      |      | BSA subtract |      |      | % Adhesion |     |     |
|----------------------------------|-----------------------|------|------|--------------|------|------|------------|-----|-----|
| 4                                | 1.01                  | 0.88 | 0.99 | 0.79         | 0.66 | 0.77 | 97         | 81  | 95  |
| 3                                | 0.98                  | 1.04 | 0.99 | 0.76         | 0.82 | 0.77 | 93         | 100 | 94  |
| 2                                | 1.07                  | 0.88 | 0.97 | 0.84         | 0.66 | 0.75 | 104        | 82  | 92  |
| 1                                | 0.98                  | 1.07 | 0.96 | 0.76         | 0.85 | 0.74 | 94         | 104 | 91  |
| 0                                | 0.94                  | 1.06 | 0.95 | 0.72         | 0.83 | 0.73 | 88         | 103 | 90  |
| -1                               | 1.15                  | 1.13 | 0.87 | 0.93         | 0.91 | 0.65 | 115        | 112 | 79  |
| -2                               | 1.21                  | 0.92 | 0.94 | 0.99         | 0.70 | 0.72 | 122        | 86  | 89  |
| -3                               | 1.20                  | 1.01 | 1.11 | 0.98         | 0.79 | 0.89 | 120        | 97  | 109 |
| -4                               | 1.19                  | 1.19 | 1.18 | 0.96         | 0.97 | 0.96 | 119        | 120 | 118 |
| No antibody                      | 1.09                  | 0.91 | 1.10 |              |      |      |            |     |     |
| Anti $\alpha\beta 8$             | 0.48                  | 0.50 | 0.41 |              |      |      |            |     |     |
| BSA                              | 0.25                  | 0.23 | 0.18 |              |      |      |            |     |     |
| No Ab (avg.)-BSA(avg.)           |                       |      | 0.81 |              |      |      |            |     |     |

**Table S1.** Source data for Fig. 1 (D and E).

| LAP conc.<br>( $\mu\text{g/mL}$ ) | CHO WT            |      |      | CHO ( $\alpha\text{v}$ ) |      |      | WI-38             |      |      |
|-----------------------------------|-------------------|------|------|--------------------------|------|------|-------------------|------|------|
|                                   | Absorbance 595 nm |      |      | Absorbance 595 nm        |      |      | Absorbance 595 nm |      |      |
| <b>0.01</b>                       | 0.24              | 0.21 | 0.22 | 0.35                     | 0.36 | 0.33 | 0.41              | 0.40 | 0.41 |
| <b>0.03</b>                       | 0.23              | 0.19 | 0.27 | 0.49                     | 0.53 | 0.43 | 0.42              | 0.44 | 0.43 |
| <b>0.1</b>                        | 0.20              | 0.26 | 0.21 | 0.66                     | 0.63 | 0.69 | 0.57              | 0.47 | 0.55 |
| <b>0.3</b>                        | 0.24              | 0.21 | 0.23 | 0.87                     | 0.72 | 0.80 | 0.76              | 0.57 | 0.67 |
| <b>1</b>                          | 0.21              | 0.30 | 0.21 | 0.99                     | 0.90 | 0.84 | 0.79              | 0.77 | 0.82 |
| <b>3</b>                          | 0.31              | 0.25 | 0.35 | 1.08                     | 0.99 | 1.00 | 0.96              | 0.88 | 0.93 |
| <b>10</b>                         | 0.39              | 0.40 | 0.36 | 0.99                     | 1.17 | 1.00 | 0.99              | 0.98 | 0.99 |

**Table S2.** Source data for Fig. 2B.

| C8 conc.<br>log [c8] (nM) | Absorbance 595nm |      |      |      | BSA subtract |      |      | % Adhesion |    |     |
|---------------------------|------------------|------|------|------|--------------|------|------|------------|----|-----|
|                           |                  |      |      |      |              |      |      |            |    |     |
| 4                         | 0.35             | 0.42 | 0.35 | 0.37 | 0.08         | 0.16 | 0.09 | 10         | 18 | 10  |
| 3                         | 0.41             | 0.39 | 0.41 | 0.40 | 0.14         | 0.13 | 0.15 | 17         | 15 | 17  |
| 2                         | 0.51             | 0.47 | 0.41 | 0.46 | 0.25         | 0.20 | 0.15 | 28         | 23 | 17  |
| 1                         | 0.59             | 0.51 | 0.68 | 0.59 | 0.33         | 0.25 | 0.41 | 38         | 29 | 48  |
| 0                         | 0.75             | 0.71 | 0.63 | 0.70 | 0.49         | 0.45 | 0.37 | 56         | 52 | 42  |
| -1                        | 1.09             | 0.97 | 0.99 | 1.02 | 0.83         | 0.71 | 0.73 | 95         | 82 | 84  |
| -2                        | 1.19             | 1.03 | 1.20 | 1.14 | 0.92         | 0.77 | 0.94 | 106        | 88 | 107 |
| -3                        | 1.14             | 1.12 | 1.20 | 1.15 | 0.87         | 0.86 | 0.94 | 100        | 98 | 107 |
| No Antibody               | 1.14             | 1.16 | 1.11 |      |              |      |      |            |    |     |
| anti $\beta$ 1            | 0.46             | 0.53 | 0.46 |      |              |      |      |            |    |     |
| anti $\alpha$ v           | 0.46             | 0.50 | 0.43 |      |              |      |      |            |    |     |
| BSA                       | 0.29             | 0.26 | 0.25 |      |              |      |      |            |    |     |
| No Ab (avg) - BSA (avg)   |                  |      | 0.87 |      |              |      |      |            |    |     |

**Table S3.** Source data for Fig. 2C.

| WI38<br>log [c8] (nM) | Luminescence |     |     | avg. | % TGF beta activation |     |     | avg. |
|-----------------------|--------------|-----|-----|------|-----------------------|-----|-----|------|
|                       |              |     |     |      |                       |     |     |      |
| 4                     | 220          | 270 | 250 |      | -19                   | -10 | -13 |      |
| 3                     | 410          | 370 | 305 |      | 15                    | 8   | -4  |      |
| 2                     | 345          | 420 | 425 |      | 3                     | 16  | 17  |      |
| 1                     | 405          | 445 | 410 |      | 14                    | 21  | 15  |      |
| 0                     | 480          | 515 | 480 |      | 27                    | 33  | 27  |      |
| -1                    | 875          | 790 | 755 |      | 96                    | 82  | 75  |      |
| -2                    | 960          | 885 | 841 |      | 111                   | 98  | 90  |      |
| No Antibody           | 950          | 885 | 850 | 895  | 110                   | 98  | 92  | 100  |
| Anti TGFβ (1D11)      | 350          | 305 | 325 | 327  | 4                     | -4  | 0   | 0    |

| CHO av<br>log [c8] (nM) | Luminescence |     |     | avg. | % TGF beta activation |     |     | avg. |
|-------------------------|--------------|-----|-----|------|-----------------------|-----|-----|------|
|                         |              |     |     |      |                       |     |     |      |
| 4                       | 363          | 253 | 273 |      | -1                    | -20 | -16 |      |
| 3                       | 383          | 343 | 283 |      | 2                     | -5  | -15 |      |
| 2                       | 313          | 383 | 333 |      | -10                   | 2   | -6  |      |
| 1                       | 373          | 363 | 423 |      | 1                     | -1  | 9   |      |
| 0                       | 423          | 533 | 633 |      | 9                     | 28  | 45  |      |
| -1                      | 783          | 973 | 903 |      | 70                    | 102 | 90  |      |
| -2                      | 993          | 893 | 990 |      | 106                   | 89  | 105 |      |
| No Antibody             | 1013         | 953 | 913 | 960  | 109                   | 99  | 92  | 100  |
| Anti TGFβ (1D11)        | 383          | 363 | 363 | 370  | 2                     | -1  | -1  | 0    |

| mHSC<br>log [c8] (nM) | Luminescence |     |     | avg. | % TGF beta activation |     |     | avg. |
|-----------------------|--------------|-----|-----|------|-----------------------|-----|-----|------|
|                       |              |     |     |      |                       |     |     |      |
| 4                     | 225          | 263 | 245 |      | -17                   | -11 | -14 |      |
| 3                     | 401          | 362 | 310 |      | 14                    | 7   | -2  |      |
| 2                     | 342          | 415 | 421 |      | 3                     | 16  | 17  |      |
| 1                     | 401          | 431 | 415 |      | 14                    | 19  | 16  |      |
| 0                     | 475          | 510 | 473 |      | 27                    | 33  | 26  |      |
| -1                    | 865          | 802 | 765 |      | 96                    | 84  | 78  |      |
| -2                    | 955          | 875 | 835 |      | 111                   | 97  | 90  |      |
| No Antibody           | 955          | 895 | 820 | 890  | 111                   | 101 | 88  | 100  |
| Anti TGFβ (1D11)      | 310          | 336 | 325 | 324  | -2                    | 2   | 0   | 0    |

| mLufb<br>log [c8] (nM) | Luminescence |     |     | avg. | % TGF beta activation |    |    | avg. |
|------------------------|--------------|-----|-----|------|-----------------------|----|----|------|
|                        |              |     |     |      |                       |    |    |      |
| 4                      | 312          | 336 | 290 |      | -2                    | 2  | -5 |      |
| 3                      | 345          | 354 | 306 |      | 4                     | 5  | -2 |      |
| 2                      | 375          | 409 | 369 |      | 8                     | 14 | 8  |      |
| 1                      | 457          | 382 | 487 |      | 22                    | 10 | 26 |      |
| 0                      | 467          | 504 | 429 |      | 23                    | 29 | 17 |      |
| -1                     | 871          | 869 | 925 |      | 87                    | 87 | 96 |      |

|                  |     |     |     |     |     |    |     |     |
|------------------|-----|-----|-----|-----|-----|----|-----|-----|
| -2               | 993 | 898 | 952 |     | 107 | 92 | 100 |     |
| No Antibody      | 988 | 870 | 991 | 950 | 106 | 87 | 107 | 100 |
| Anti TGFβ (1D11) | 305 | 340 | 320 | 322 | -3  | 3  | 0   | 0   |

| nhLufb<br>log [c8] (nM) | Luminescence |     |     | avg. | % TGF beta activation |     |     | avg. |
|-------------------------|--------------|-----|-----|------|-----------------------|-----|-----|------|
| 4                       | 275          | 315 | 305 |      | -9                    | -2  | -4  |      |
| 3                       | 335          | 305 | 355 |      | 1                     | -4  | 5   |      |
| 2                       | 305          | 365 | 415 |      | -4                    | 6   | 15  |      |
| 1                       | 425          | 405 | 485 |      | 17                    | 13  | 27  |      |
| 0                       | 455          | 465 | 515 |      | 22                    | 24  | 32  |      |
| -1                      | 805          | 913 | 885 |      | 82                    | 101 | 96  |      |
| -2                      | 865          | 875 | 975 |      | 93                    | 94  | 111 |      |
| No Antibody             | 965          | 925 | 835 | 908  | 110                   | 103 | 87  | 100  |
| Anti TGFβ (1D11)        | 395          | 335 | 255 | 328  | 11                    | 1   | -13 | 0    |

| IPFfb<br>log [c8] (nM) | Luminescence |     |     | avg. | % TGF beta activation |    |     | avg. |
|------------------------|--------------|-----|-----|------|-----------------------|----|-----|------|
| 4                      | 218          | 298 | 258 |      | -15                   | -2 | -9  |      |
| 3                      | 408          | 358 | 308 |      | 15                    | 7  | -1  |      |
| 2                      | 338          | 408 | 426 |      | 4                     | 15 | 18  |      |
| 1                      | 408          | 421 | 428 |      | 15                    | 18 | 19  |      |
| 0                      | 481          | 528 | 468 |      | 27                    | 35 | 25  |      |
| -1                     | 808          | 758 | 951 |      | 80                    | 72 | 102 |      |
| -2                     | 958          | 905 | 965 |      | 104                   | 95 | 105 |      |
| No Antibody            | 945          | 878 | 984 | 936  | 101                   | 91 | 108 | 100  |
| Anti TGFβ (1D11)       | 298          | 328 | 308 | 311  | -2                    | 3  | -1  | 0    |

**Table S4.** Source data for Fig. 2D.

| Sirius red                | C16 Oil | C8 Oil | C16 CCl <sub>4</sub> | C8 CCl <sub>4</sub> |
|---------------------------|---------|--------|----------------------|---------------------|
| % Area                    | 2       | 2      | 6                    | 3                   |
|                           | 1       | 1      | 5                    | 5                   |
|                           | 2       | 2      | 5                    | 2                   |
|                           | 1       | 1      | 9                    | 3                   |
|                           | 1       | 2      | 6                    | 5                   |
|                           | 1       | 1      | 6                    | 4                   |
|                           | 1       | 2      | 7                    | 2                   |
|                           | 1       | 2      | 6                    | 3                   |
| Hydroxyproline<br>(µg/mL) | C16 Oil | C8 Oil | C16 CCl <sub>4</sub> | C8 CCl <sub>4</sub> |
|                           | 54      | 71     | 135                  | 86                  |
|                           | 64      | 59     | 147                  | 66                  |
|                           | 61      | 51     | 108                  | 66                  |
|                           | 36      | 59     | 165                  | 85                  |
|                           | 38      | 35     | 113                  | 95                  |
|                           | 49      | 41     | 122                  | 79                  |
|                           | 59      | 87     | 169                  | 91                  |
|                           | 58      | 44     | 130                  | 104                 |
|                           | 40      | 34     | 159                  | 99                  |
|                           | 45      | 32     | 109                  | 115                 |

**Table S5.** Source Data for Fig. 3C.



| Sirius red                | C16 Oil | C8 Oil | C16 CCl <sub>4</sub> | C8 CCl <sub>4</sub> |
|---------------------------|---------|--------|----------------------|---------------------|
| % Area                    | 2       | 2      | 6                    | 3                   |
|                           | 1       | 1      | 5                    | 5                   |
|                           | 2       | 2      | 5                    | 2                   |
|                           | 1       | 1      | 9                    | 3                   |
|                           | 1       | 2      | 6                    | 5                   |
|                           | 1       | 1      | 6                    | 4                   |
|                           | 1       | 2      | 7                    | 2                   |
|                           | 1       | 2      | 6                    | 3                   |
| Hydroxyproline<br>(µg/mL) | C16 Oil | C8 Oil | C16 CCl <sub>4</sub> | C8 CCl <sub>4</sub> |
|                           | 54      | 71     | 135                  | 86                  |
|                           | 64      | 59     | 147                  | 66                  |
|                           | 61      | 51     | 108                  | 66                  |
|                           | 36      | 59     | 165                  | 85                  |
|                           | 38      | 35     | 113                  | 95                  |
|                           | 49      | 41     | 122                  | 79                  |
|                           | 59      | 87     | 169                  | 91                  |
|                           | 58      | 44     | 130                  | 104                 |
|                           | 40      | 34     | 159                  | 99                  |
|                           | 45      | 32     | 109                  | 115                 |

**Table S6.** Source Data for Fig. 3F.
